# Supplementary material for: Templation of a square grid copper(ii) 4,4′-bipyridine network by a 3D PtS-related Cu(i)–Cu(ii) 4,4′-bipyridine crystal
Source: Royal Society of Chemistry journal article supplement (doi:10.1039/c5cc08266h), 2015-11-10
Supplement: c5cc08266h1.pdf [file c5cc08266h1.pdf]

## Electronic Supplementary Information

### Templation of a square grid copper(II) 4,4'-bipyridine network by a 3D PtS-related Cu(I)-Cu(II) 4,4'-bipyridine crystal

Carmel T. Abrahams, Brendan F. Abrahams,\* Timothy A. Hudson, Richard Robson\*

#### **Contents**

1. Channel contents in
  - i)  $[\text{Cu}_2(4,4'\text{bipy})_4](\text{NO}_3)(\text{S}_2\text{O}_6)\cdot\text{H}_2\text{O}$  (orange crystals)
  - ii)  $[\text{Cu}(4,4'\text{bipy})_2](\text{S}_2\text{O}_6)$  (blue crystals)
2. Calculated and experimental powder diffraction patterns for
  - iii)  $[\text{Cu}_2(4,4'\text{bipy})_4](\text{NO}_3)(\text{S}_2\text{O}_6)\cdot\text{H}_2\text{O}$  (orange crystals)
  - iv)  $[\text{Cu}(4,4'\text{bipy})_2](\text{S}_2\text{O}_6)$  (blue crystals)
3. Microscope photographs of orange-blue composite figures.

a)

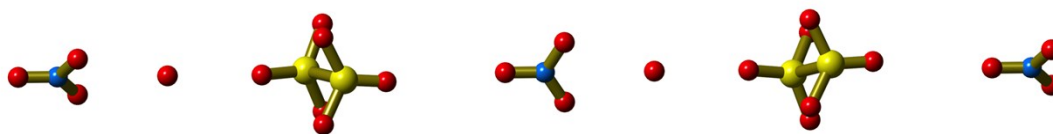

b)

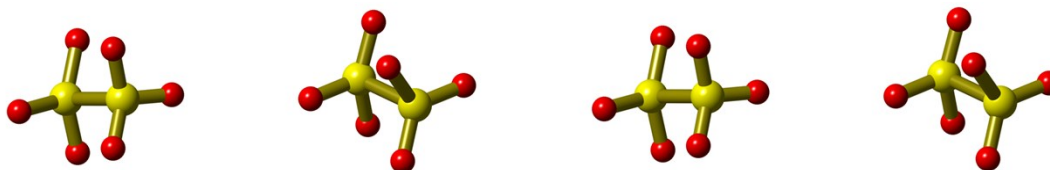

**Figure S1.** Channel contents in a)  $[\text{Cu}_2(4,4'\text{bipy})_4](\text{NO}_3)(\text{S}_2\text{O}_6) \cdot \text{H}_2\text{O}$  (orange crystals) and b)  $[\text{Cu}(4,4'\text{bipy})_2](\text{S}_2\text{O}_6)$  (blue crystals). The anions are disordered around 4-fold axes that run along the length of the channels. Colour code: S yellow, O red, N blue; H atoms have been omitted for clarity.

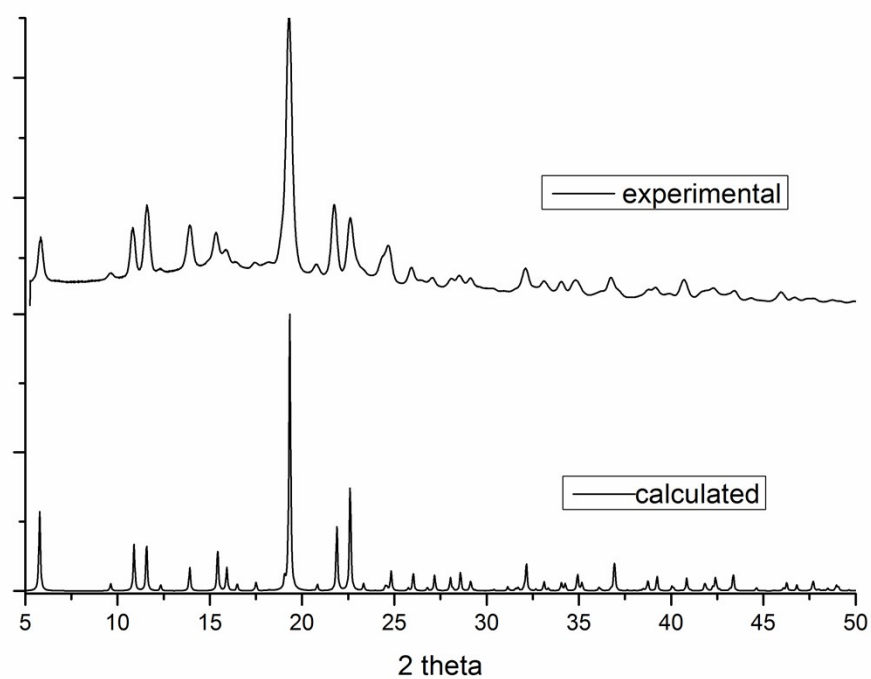

**Figure S2.** Experimental and calculated powder diffraction patterns for  $[\text{Cu}_2(4,4'\text{bipy})_4](\text{NO}_3)(\text{S}_2\text{O}_6) \cdot \text{H}_2\text{O}$  (orange crystals)

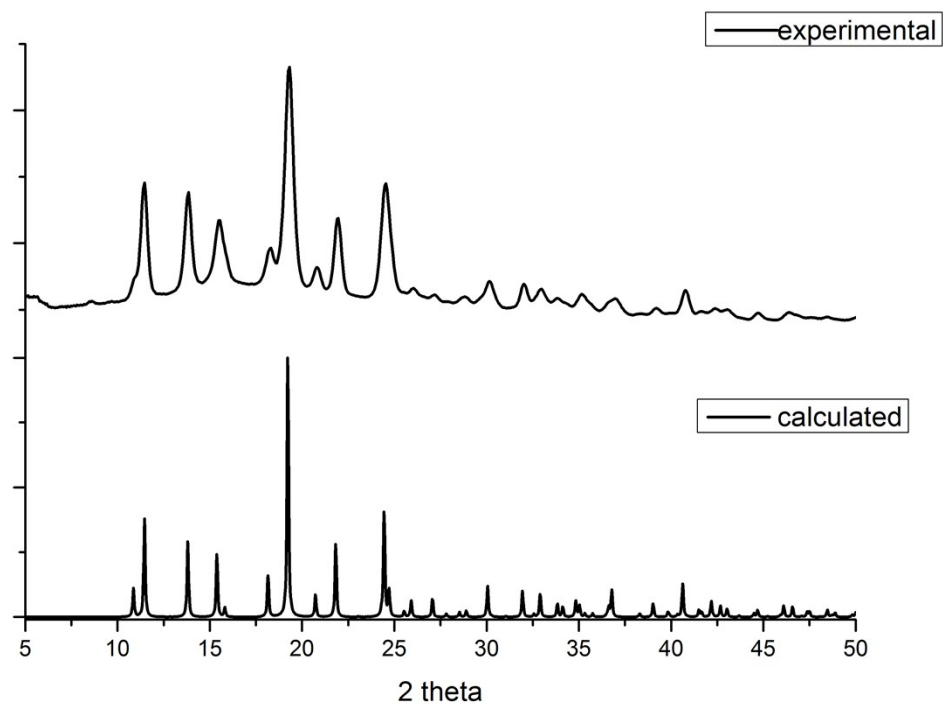

**Figure S3.** Experimental and calculated powder diffraction patterns for  $[\text{Cu}(4,4'\text{bipy})_2](\text{S}_2\text{O}_6)$  (blue crystals)

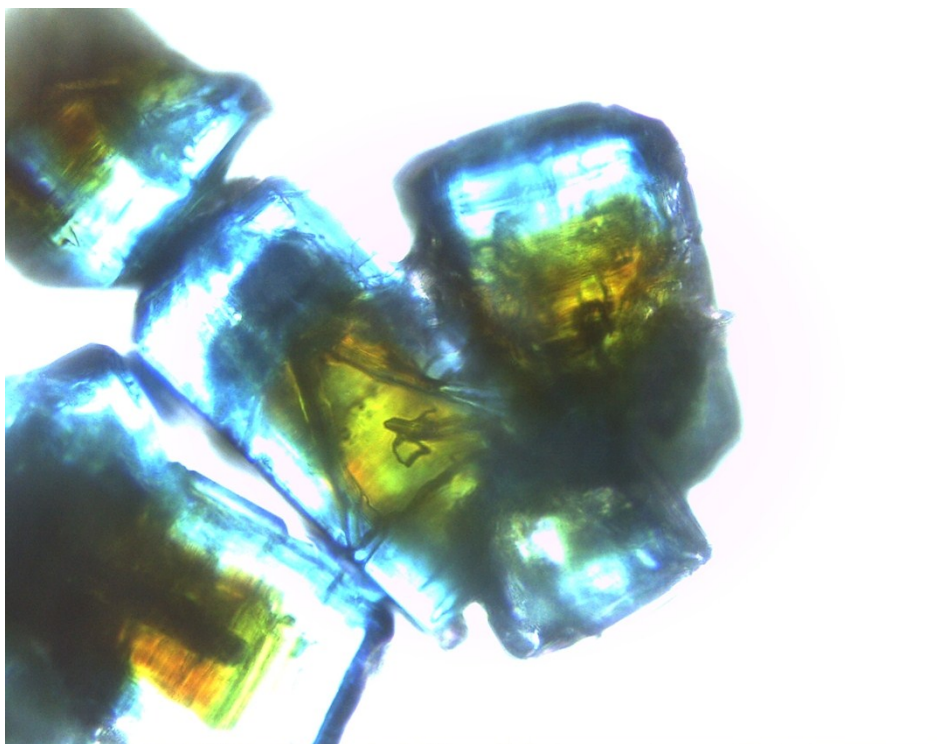

**Figure S4.** Microscope photograph of the  $[\text{Cu}_2(4,4'\text{bipy})_4](\text{NO}_3)(\text{S}_2\text{O}_6)\cdot\text{H}_2\text{O}$  (orange crystals) and  $\text{Cu}(4,4'\text{bipy})_2(\text{S}_2\text{O}_6)$  (blue crystals) composite crystals
